# Supplementary material for: Antioxidant Activity of a Sicilian Almond Skin Extract Using In Vitro and In Vivo Models
Source: MDPI journal article supplement (doi:10.3390/ijms241512115), 2023-07-28
Supplement: s1 [file s1]

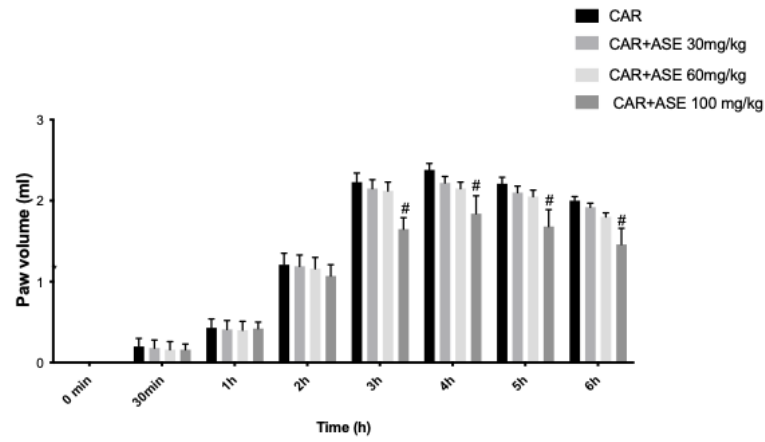

**Figure S1.** Preliminary data of acute effects of ASE at different doses on car-induced paw edema. The animals were treated at different doses respectively 30, 60, and 100 mg/kg. Values = means  $\pm$  standard error of the mean (SEM) of six animals in each group; # $p < 0.05$  vs. Carrageenan (CAR).
